# Supplementary material for: Infection Characteristics and Transmission Patterns of Helicobacter pylori in Families of Early Gastric Cancer Patients
Source: Research Square preprint supplement (doi:10.21203/rs.3.rs-6897943/v1), 2025-06-25
Supplement: Supplementary file 1 [file daaf7a0ec16dbbc5e465fa27.docx]

**Version** **1.0**

**Development** **date** **20240620**

**Case** **Report** **Form**

**Patient** **ID:**

**Patient** **Name:**

**Research** **unit:**

**Enrollment** **Date:**

**Facilitators:**

**Inclusion** **and** **exclusion** **criteria**

# Inclusion criteria (To be enrolled, all of the following requirements must be meet)

1. Early gastric cancer patients, regardless of age and gender.

□Yes □No

1. Multi-person family

(Definition of multi-person family: living together for more than 10 consecutive months per year)

□Yes □No

# Exclusion criteria (Subjects are not eligible for enrollment if they meet any of the following criteria)

1. Used antibiotics within the past month, proton pump inhibitors within two weeks.

□Yes □No

1. *H.* *pylori* treatment within the past three months

□Yes □No

1. Severe cardiac, hepatic, or renal insufficiency

□Yes □No

1. Contraindications to performing 13C-UBT

□Yes □No

# Physician Signature： Date：

**Questionnaire**

| Family ID |  | Name of household head |  | Telephone number |  | Family size |  |
| --- | --- | --- | --- | --- | --- | --- | --- |
|  | 1.Head of household; 2.Husband; 3.Wife; | | | 4.Children; 5.Father; 6.Mother; 7.Brothers and sisters; | | | |
| Family |  | | |  | | | |
|  | 8.Daughter in law/son-in-law; 9.Grandfather; | | | 10.Grandmother; 11.Grandchildren; 12.Granddaughter in | | | |
| structure | law/son-in-law; 13.Others | | |  | | | |
| Address | Province City District | | | Street Road | | | |

**Question** **for** **the** **family**

| **1**、**Family** **economy** **and** **living** **conditions** | | |
| --- | --- | --- |
| 1.1 | Annual family income (RMB): 1.<100,000; 2.100,000-300,000; 3.>300,000 |  |
| 1.2 | Living area: 1. City; 2. Rural |  |
| 1.3 | Total living area (m2)：1.<60; 2.60-120; 3.>120 |  |
| 1.4 | Do you keep animals at home? 1.No; 2.Yes |  |
| 1.4.1 | If yes, what animal is it? 1. Pets; 2. Poultry; 3. Livestock |  |
| **2**、**Family** **hygienic** **and** **living** **habits** | | |
| 2.1 | Source of drinking water: 1. Boiled water; 2. Tap water; 3. Bottled water; 4. Well water;  5. Purified water |  |
| 2.2 | Cleaning of household dishes and chopsticks: 1. Wash with tap water; 2. In a basin |  |
| 2.3 | Disinfection of household dishes and chopsticks: 1. Without disinfection; 2. Disinfection cabinet;  3. Other disinfection methods |  |
| 2.4 | Do you share the following items in your family? 1. Dishes and chopsticks; 2. Cups;  3. Mouthwash cups; 4. Dental appliances |  |
| 2.5 | Is individual dining adopted in the family? 1.Yes 2. No |  |
| 2.6 | Is serving chopsticks and spoons adopted for family meals? 1.Yes 2. No |  |
| **3**、**Family** **disease** **history** **(including** **deceased** **members** **within** **three** **generations)** | | |
| 3.1 | Do you have any of the following diseases? 1. Gastric ulcer; 2. Gastric cancer; 3. No |  |

**Survey** **based** **on** **family** **members**

**(each** **member** **fills** **in** **the** **following** **questions)**

**4**、**General** **information** **of** **family** **members**

| Family ID |  | Name |  | Contact  number |  | ID card  number |  | |
| --- | --- | --- | --- | --- | --- | --- | --- | --- |
| Gender | 1. Male; 2. Female | Nation |  | Date of birth |     Year   Month   Day | | | |
| 4.1 | Time of living together in the family: 1.<5 year; 2. ≥ 5 year; 3. ≥ 15 years; 4. ≥ 30 years | | | | | | |  |
| 4.2 | Marital status: 1 Single; 2 Married; 3. Other | | | | | | |  |
| 4.3 | Education level: 1. Middle/High School; 2. College and above | | | | | | |  |
| 4.4 | Occupation: 1. Worker; 2. Farmer; 3. Teacher; 4. Investigator; 5. Doctor; 6. Students;  7. Soldier; 9. Merchant; 10. Others | | | | | | |  |
| **5**、**Personal** **hygiene** **and** **living** **habits** | | | | | | | | |
| 5.1 | Do you drink tap water (More than two times a week)? 1.No 2.Yes | | | | | | |  |
| 5.2 | Do you wash your hands before meals and after defecation? 1.No 2.Yes | | | | | | |  |
| 5.3 | Dining out frequency: 1. Rare; 2. More than two days a week | | | | | | |  |
| 5.3.1 | If "2" is selected, fill in the dining place: 1. Cafeteria dining; 2. Dining at road side restaurant; 3.  Dining at hotel restaurant | | | | | | |  |
| **6**、**Past** **medical** **history** | | | | | | | | |
| 6.1 | Do you have gastrointestinal discomfort in the past 1 year? 1.No 2.Yes | | | | | | |  |
| 6.2 | Have you had gastroscopy within 5 years? 1.No 2.Yes | | | | | | |  |
| 6.3 | Have you ever tested Helicobacter pylori infection? 1.No 2.Yes | | | | | | |  |
| 6.3.1 | If "yes", the results are: 1. Positive; 2. Negative | | | | | | |  |
| 6.4 | Have you used the following drugs in the past 1 month? 1. No; 2. Antibiotics; 3. PPI; 4.  Bismuth; 5. Antimicrobial traditional Chinese medicine | | | | | | |  |
| 6.5 | Do you have a history of gastroduodenal surgery? 1.No 2.Yes | | | | | | |  |
| **7**、**Families** **with** **children** **and** **adolescents** **aged** **1-18** **continue** **to** **fill** **in** **the** **following** **questions** | | | | | | | | |
| 7.1 | Number of children in the family: 1.1; 2.2; 3.3-4; 5.5 or more | | | | | | |  |
| 7.2 | Do parents have the habit of mouth-to-mouth feeding? 1.No 2.Yes | | | | | | |  |
| 7.3 | Do children have the habit of holding toys in mouth? 1.No 2.Yes | | | | | | |  |
| 7.4 | Do parents often kiss their children mouth to mouth? 1.No 2.Yes | | | | | | |  |

| 7.5 | Kindergarten age: 1. Never; 2. <3 years old; 3. Aged 3-5; 4.>5 years old |  |
| --- | --- | --- |
| 7.6 | Who is the primary caretaker of the child? 1. Mother 2. Grandmother 3. Grandfather  4. Father 5. Housekeeper 6. Others |  |

Investigator (signature): Date of investigation：    Year   Month   Day

# Investigator Statement:

All clinical data have been truthfully, accurately and completely documented in the CRF.

# Physician signature： Date：

**I** **have** **reviewed** **the** **above** **content** **and** **confirmed** **the** **accuracy.** **Signature** **of** **the** **head** **director:** **Date:**

版本号 **1.0**

制定日期 **20240620**

病例报告表

(Case Report Form)

患者编号：□□□□患者姓名：□□□□

研究单位：南京大学医学院附属鼓楼医院

研究入组时间： 年 月 日

入选、排除标准

入选标准（受试者必须满足以下所有要求，方可入选）

1. 早期胃癌患者，不限年龄和性别。

□ 是 □否

1. 非独居家庭(非独居家庭定义为每个家庭有≥2个家庭成员且每年至少连续十个月共同居住）

□是 □否

排除标准（受试者如果符合以下任意一项要求，即不可入选）

1. 一个月内服用过抗生素、铋剂、有抗菌作用的中药或两周内服用过质子泵抑制剂、H2 受体拮抗剂等药物。

□是 □否

1. 近三个月内接受过 HP 根除治疗

□是 □否

1. 有严重心、肝、肾功能不全，严重神经病变或精神疾病者；

□是 □否

1. 研究者认为不适合参加本项目的受检者

□是 □否

注：入选标准均回答“是”，排除标准均回答“否”方能入选。

医师签名：日期：

早期胃癌患者家庭Hp感染大数据调查表（一户一表）

| 家庭编号 |  | | 户主姓名 |  | 联系电话 |  | | 家庭中共同生活人数 | |  |
| --- | --- | --- | --- | --- | --- | --- | --- | --- | --- | --- |
| 家族成员  结构 | 1 户主本人 2 夫 3 妻 4 儿女 5 父亲 6 母亲 7 兄弟姐妹 8 媳/婿 9（外）祖父 10（外）祖母 11 孙（女）  12 孙媳/婿 13 其它 | | | | | | | | | |
| 家庭地址 | 省 | 市(县) | | 区(乡) |  | 街道(村) | 路(小组) | | 号 |  |

家庭共性问题

| 1、家庭经济和居住状况 | | |
| --- | --- | --- |
| 1.1 | 家庭年收入：1.<10 万 2.10-30 万 3.>30 万 |  |
| 1.2 | 生活地区 1.城市 2. 城乡结合部/小城镇，城郊 3.农村 |  |
| 1.3 | 家庭居住总面积（建筑面积/平方米）：1.<60 2.60-120 3.>120 |  |
| 1.4 | 家庭养有动物吗？1.无 2.有 |  |
| 1.4.1 | 有，是什么动物？1.宠物 2.家禽 3.家畜 |  |
| 2、家庭卫生和生活习惯 | | |
| 2.1 | 家庭的饮用水主要来源于： 1.自来水（加热）2.自来水（生水） 3.瓶装水 4.井水 5.纯净水 |  |
| 2.2 | 家庭碗筷刷洗情况如何： 1.流水洗 2.静水/盆洗洗 |  |
| 2.3 | 家庭碗筷消毒情况如何： 1. 无消毒 2. 自动消毒柜 3.其他消毒法 |  |
| 2.4 | 家庭中是否有以下物品共用： 1.碗筷 2.茶杯 3.漱口杯 4.牙具 |  |
| 2.5 | 家庭内聚餐是否采用分餐制？：1.是 2. 否 |  |
| 2.6 | 家庭聚餐是否使用公筷、公勺? 1.是 2. 否 |  |
| 3、家族疾病史（包括已故的三代内的成员） | | |
| 3.1 | 是否有下列疾病： 1. 胃溃疡 2. 胃癌 3.无 |  |

以家庭成员个体模块的调查（每一成员填写下列问题）

| 4、家庭成员一般情况 | | | | | | | | | |
| --- | --- | --- | --- | --- | --- | --- | --- | --- | --- |
| 家庭内编号 | |  | 姓名 |  | 联系电话 |  | 身份证号 |  | |
| 性别 | 1.男 2.女 | | 民族 |  | 出生日期 |     年   月   日 | | | |
| 4.1 | | 在本家庭共同生活的时间：1.＜5 年 2.≥5 年 3.≥15 年 4.≥30 年 | | | | | | |  |
| 4.2 | | 婚姻状况：1 未婚 2 已婚 3.其它 | | | | | | |  |
| 4.3 | | 文化程度：1.初中及高中 2.大专/大学及以上 | | | | | | |  |
| 4.4 | | 职业：1 工人 2 农民 3 教师 4 管理/科技人员 5 医务人员 6 学生 7.军人；9.个体，10.其它 | | | | | | |  |
| 5、个人卫生和生活习惯 | | | | | | | | | |

| 5.1 | 是否喝生水(每周二天以上)? 1. 否 2. 是 |  |
| --- | --- | --- |
| 5.2 | 饭前便后洗手吗? 1. 否 2. 是 |  |
| 5.3 | 外出就餐频率：1.很少 2.每周二天以上 |  |
| 5.3.1 | 选择 2 者填写在外进餐地点：1.学校/单位食堂 2.小型餐馆 3.大型饭店 |  |
| 6、既往病史 | | |
| 6.1 | 近 1 年内是否有胃肠道不适症状：1.无 2.有 |  |
| 6.2 | 5 年之内是否做过胃镜：1.否 2.是 |  |
| 6.3 | 是否曾做过幽门螺杆菌感染的相关检查：1. 否 2. 是 |  |
| 6.3.1 | 若做过，结果如何：1.阳性 2.阴性 |  |
| 6.4 | 近 1 月内是否用过以下药物：1.否 2.抗生素 3.抑酸剂 4.铋剂 5.抗菌作用的中药 |  |
| 6.5 | 是否有胃十二指肠手术史 1. 否 2. 是 |  |
| 7、有 1-18 岁儿童的家庭继续填写下列问题 | | |
| 7.1 | 儿童数： 1.独生子女 2.2 个 3.3-4 个 5.5 个或以上 |  |
| 7.2 | 家长是否有将食物咀嚼或口对口喂食习惯： 1. 无 2. 有 |  |
| 7.3 | 儿童是否有将玩具或物品塞入口中的习惯：1. 无 2. 有 |  |
| 7.4 | 家长经常口对口亲吻孩子吗： 1. 无 2. 有 |  |
| 7.5 | 进幼儿园情况：1.从未进过 2.3 岁以前进 3.3-5 岁进 4.>5 岁进 |  |
| 7.6 | 主要由谁照看：1.母亲 2.（外）祖母 3.（外）祖父 4.父亲 5.家政人员 6.其他 |  |

调查员（签字）： 调查日期：    年   月   日

研究者声明：

所有临床资料都已真实、准确并完整地记录在 **CRF** 中。

医师签名：

日 期：

以上内容已经我审核，确认无误。

中心负责人签字：日期：年月日
